# Supplementary material for: NeuroElectro: a window to the world's neuron electrophysiology data
Source: Front Neuroinform. 2014 Apr 29;8:40. doi: 10.3389/fninf.2014.00040 (PMC4010726; doi:10.3389/fninf.2014.00040)
Supplement: Supplementary file 2 [file DataSheet3.XLSX]

## Sheet: Sheet1
Ephys parameters	Definitions (most common)	synonyms	usual units	NeuroElectro ID	NeuroLex ID
cell capacitance	Neuron capacitance, typically measured by dividing membrane time constant by membrane resistance	Cell_capacitance, Cm, C, capacitance, whole cell capacitance	pF	1	oen_0001024
input resistance	Input resistance at steady-state (steady-state of voltage response to current injection)	R<sub>in</sub>, R<sub>N</sub>, Maximum R<sub>in</sub>, R<sub>input</sub>, Rin, RN	MΩ	2	oen_0001023
resting membrane potential	Membrane potential at the onset of whole-cell recording	V<sub>rest</sub>, V<sub>m</sub>, resting potential, membrane potential, RMP, Vm	mV	3	oen_0001268
membrane time constant	Time constant for the membrane to repolarize after a SMALL hyperpolarizing current injection of fixed amplitude and duration	time constant, tau, τ	ms	4	oen_0001253
spike amplitude	Average amplitude of the first AP (measured from AP threshold to AP peak)	AP<sub>h</sub>, Amplitude of AP, spike height, AP amp, AP height, AP amplitude, action potential amplitude, action potential height	mV	5	oen_0001020
spike half-width	Average time for first AP half amp to the same voltage during offset	spike halfwidth, half-width of spike, half-width of action potential, half amplitude duration, spike half width, spike half duration	ms	6	oen_0001019
spike threshold	Voltage at which AP is initiated (as measured by looking at the rate of rise of Vm)	AP<sub>th</sub>, AP<sub>thresh</sub>, threshold of AP, AP VTH, action potential threshold, thresh, AP thresh, AP threshold, v thresh	mV	7	oen_0001015
rheobase	Current threshold to discharge APs during a ramp depolarization. Minimum current required to fire an action potential during very slow increases in current.	current threshold, I thresh, I<sub>thresh</sub>, AP rheobase	pA	8	oen_0001018
firing frequency	AP discharge rate	firing rate, FR	Hz	9	oen_0001022
AHP duration	Time to the maximal afterhyperpolarization following an AP	after-hyperpolarization potential duration, afterhyperpolarization potential duration, t<sub>amp</sub>, AHP dur, AHP peak time	ms	10	oen_0001021
cell diameter	Diameter of the cell soma	diameter, soma diameter	μm	11	oen_0001017
access resistance	Sum of the electrode resistance and the resistance at the electrode-cell junction	access_resistance, series_resistance		12	oen_0001016
sag ratio	Ratio between exponentially extrapolated voltage and steady-state voltage	sag-ratio, sag index, sag		13	oen_0001015
spike overshoot	Difference between the peak of the action potential and 0 mV	action potential overshoot, overshoot, AP overshoot	mV	14	oen_0001014
cell surface area	Cross-sectional area of the cell	area, surface area	μm<sup>2</sup>	15	oen_0001013
AHP amplitude	Amplitude from first AP onset to minimum voltage, not explicitly fast or slow	after-hyperpolarization potential amplitude, afterhyperpolarization potential amplitude, AHP magnitude, AHP amplitude, AHP size, AHP peak amplitude, AHP	mV	16	oen_0001009
FI slope	The slope of the current-discharge relationship from discharge threshold	slope of FI curve, FR vs. I slope	Hz/nA	17	oen_0001012
Spontaneous firing rate	AP discharge rate in the absence of current injection or a stimulus	spontaneous firing frequency	Hz	18	oen_0001011
fast afterhyperpolarization amplitude	Amplitude from first AP onset to minimum voltage, explictly refered to as fast	fAHP size, fAHP amp, fAHP amplitude, fast AHP amplitude, fast AHP size	mV	19	oen_0001010
fast afterhyperpolarization duration	Duration from first AP onset to minimum voltage, explictly refered to as fast	fAHP duration, fAHP time, fast AHP duration, fast AHP time	ms	20	oen_0001008
slow afterhyperpolarization amplitude	Amplitude from first AP onset to minimum voltage, explictly refered to as slow	sAHP size, sAHP amp, sAHP amplitude, slow AHP amplitude, slow AHP size	mV	21	oen_0001007
slow afterhyperpolarization duration	Duration from first AP onset to minimum voltage, explictly refered to as slow	sAHP duration, sAHP time, slow AHP duration, slow AHP time	ms	22	oen_0001006
spike width	Duration of AP, not explictly refered to as half-width	AP width, action potential width, AP duration, spike duration, AP duration	ms	23	oen_0001005
ADP amplitude	Amplitude from first AP onset to maximum voltage, typically more depolarized that the resting membrane potential	after-depolarization potential amplitude, afterdepolarization potential amplitude, ADP magnitude, ADP amplitude, ADP size, ADP peak amplitude, ADP	mV	24	oen_0001004
ADP duration	Duration from first AP onset to maximum ADP	after-depolarization potential duration, afterdepolarization potential duration, ADP duration	ms	25	oen_0001003
spike peak	Maximum voltage of AP	AP peak	mV	26	oen_0001002
adaptation ratio	Ratio of durations between early and late AP inter-spike intervals	adaptation percent		27	oen_0001000
first spike latency	Duration to first AP following a depolarizing current step of fixed amplitude	1st AP time, spike latency	ms	28	oen_0001001
