# Supplementary material for: NeuroElectro: a window to the world's neuron electrophysiology data
Source: Front Neuroinform. 2014 Apr 29;8:40. doi: 10.3389/fninf.2014.00040 (PMC4010726; doi:10.3389/fninf.2014.00040)
Supplement: Supplementary file 3 [file DataSheet4.CSV]

Neuron Type	Defining Criteria	NeuroElectro ID	NeuroLex ID	NeuroElectro Link
Abducens nucleus motor neuron	All motoneurons in the abducens nucleus	1	nlx_16848	http://neuroelectro.org/neuron/1/
Amygdala basolateral nucleus pyramidal neuron	Pyramidal or principal cells in the BLA	2	nifext_152	http://neuroelectro.org/neuron/2/
Amygdala corticomedial nucleus pyramidal cell	Pyramidal cells in the cortical amygdala	3	nifext_151	http://neuroelectro.org/neuron/3/
Amygdaloid nucleus paracapsular intercalated cell	All neurons found in the Amygdaloid nucleus paracapsular intercalated nucleus	4	nlx_cell_100202	http://neuroelectro.org/neuron/4/
Basalis nucleus cholinergic neuron	Cholingergic neurons found in the nucleus basalis	14	nlx_cell_20090203	http://neuroelectro.org/neuron/14/
BNST beaded neuron	BNST neuron, explicitly referred to as not a projection neuron	6	BAMSC995	http://neuroelectro.org/neuron/6/
BNST common spiny neuron	BNST neuron, projection neuron	7	BAMSC991	http://neuroelectro.org/neuron/7/
Cerebellar nucleus cell	Any neuron found in any of the cerebellar nuclei	208	nlx_151895	http://neuroelectro.org/neuron/208/
Cerebellum Golgi cell	Explicitly referred to as Golgi cell in the cerebellum	16	sao1415726815	http://neuroelectro.org/neuron/16/
Cerebellum granule cell	Explicitly referred to as granule cell in the cerebellum	21	nifext_128	http://neuroelectro.org/neuron/21/
Cerebellum Purkinje cell	Explicitly referred to as Purkinje cell in the cerebellum	18	sao471801888	http://neuroelectro.org/neuron/18/
Cochlea hair cell inner	Inner hair cell in the cochlea	27	sao429277527	http://neuroelectro.org/neuron/27/
Cochlear nucleus (dorsal) cartwheel cell	Explicitly referred to as cartwheel cell	29	nifext_76	http://neuroelectro.org/neuron/29/
Cochlear nucleus (dorsal) pyramidal neuron	Explicitly referred to as pyramidal cell in DCN	34	nifext_74	http://neuroelectro.org/neuron/34/
Cochlear nucleus (ventral) bushy cell	Explicitly referred to as bushy cell	37	nlx_cell_20081201	http://neuroelectro.org/neuron/37/
Cochlear nucleus (ventral) multipolar T cell	Explicitly referred to as T cell	38	nifext_68	http://neuroelectro.org/neuron/38/
Cochlear nucleus (ventral) octopus cell	Explicitly referred to as octopus cell	40	nifext_72	http://neuroelectro.org/neuron/40/
Dentate gyrus basket cell	Basket cells found in the dentate gyrus or hilar region	65	nlx_cell_100201	http://neuroelectro.org/neuron/65/
Dentate gyrus granule cell	Granule cells in the dentate gyrus	66	nlx_anat_1008005	http://neuroelectro.org/neuron/66/
Dentate gyrus hilar cell	Interneurons found in the hilus	67	nlx_cell_20090727	http://neuroelectro.org/neuron/67/
Dentate gyrus mossy cell	Mossy cells found in the dentate gyrus or hilus	68	nlx_22799	http://neuroelectro.org/neuron/68/
Dorsal motor nucleus of vagus motor neuron	Any neuron found in the dorsal motor nucleus of vagus	71	nlx_38336	http://neuroelectro.org/neuron/71/
Dorsal root ganglion cell	Any neuron explicitly referred to as DRG neurons, all sizes	72	nifext_84	http://neuroelectro.org/neuron/72/
DRG temperature cell	Any neuron explicitly referred to as temperature senstive DRG neurons	57	nifext_90	http://neuroelectro.org/neuron/57/
Entorhinal cortex layer IV neuron	layer IV neuron in entorhinal cortex	222	nlx_cell_20090310	http://neuroelectro.org/neuron/222/
Globus pallidus principal cell	Any neuron in the globus pallidus	78	nifext_149	http://neuroelectro.org/neuron/78/
Hippocampus CA1 basket cell	Explicitly referred to as basket cell, PV+ cell, or FS cell in CA1	82	nlx_cell_091205	http://neuroelectro.org/neuron/82/
Hippocampus CA1 ivy neuron	Explicitly referred to as ivy cell in CA1	210	nlx_35220	http://neuroelectro.org/neuron/210/
Hippocampus CA1 neurogliaform cell	Explicitly referred to as neurogliaform cell in CA1	83	nifext_60	http://neuroelectro.org/neuron/83/
Hippocampus CA1 oriens lacunosum moleculare neuron	Explicitly referred to as OLM cell in CA1	84	nlx_cell_091206	http://neuroelectro.org/neuron/84/
Hippocampus CA1 pyramidal cell	Explicitly referred to as pyramidal cell in CA1	85	sao830368389	http://neuroelectro.org/neuron/85/
Hippocampus CA1 radiatum giant cell	Explicitly referred to as radiatum giant cell in CA1	226		http://neuroelectro.org/neuron/226/
Hippocampus CA3 basket cell	Explicitly referred to as basket cell, PV+ cell, or FS cell in CA3	230	nlx_cell_091213	http://neuroelectro.org/neuron/230/
Hippocampus CA3 lacunosum moleculare neuron	Explicitly referred to as OLM cell in CA3	229	nlx_cell_091216	http://neuroelectro.org/neuron/229/
Hippocampus CA3 pyramidal cell	Explicitly referred to as pyramidal cell in CA3	89	nlx_36816	http://neuroelectro.org/neuron/89/
Hippocampus CA3 stratum radiatum giant cell	Explicitly referred to as radiatum giant cell in CA3	232		http://neuroelectro.org/neuron/232/
Hippocampus CA3 trilaminar neuron	Explicitly referred to as trilaminar cell in CA3	231		http://neuroelectro.org/neuron/231/
Hypoglossal nucleus motor neuron	Any motor neuron found in the hypoglossal nucleus	91	nlx_cell_100311	http://neuroelectro.org/neuron/91/
Hypothalamus oxytocin neuroendocrine magnocellular cell	Any magnocellular neurosecretory cell in the hypothalamus or supraoptic nucleus	92	nlx_416	http://neuroelectro.org/neuron/92/
Inferior colliculus neuron	Any neuron in the inferior colliculus	207	nlx_152522	http://neuroelectro.org/neuron/207/
Inferior olive neuron	Any neuron in the inferior olive	219		http://neuroelectro.org/neuron/219/
Lateral amygdala projection neuron	A projection or pyramidal neuron in the lateral amygdala; not in the BLA	211		http://neuroelectro.org/neuron/211/
Locus coeruleus NA neuron	Any noradrenergic neuron in the locus coeruleus	94	nlx_cell_20090202	http://neuroelectro.org/neuron/94/
Medial entorhinal cortex layer II stellate cell	Medial entorhinal cortex layer II stellate cell	206	nlx_36209	http://neuroelectro.org/neuron/206/
Medial entorhinal cortex layer III pyramidal cell	Medial entorhinal cortex layer III pyramidal cell	218		http://neuroelectro.org/neuron/218/
Medial Nucleus of Trapezoid Body neuron	Any neuron found in the MNTB	214	nifext_79	http://neuroelectro.org/neuron/214/
Medial vestibular nucleus neuron	Any MVN neuron	223		http://neuroelectro.org/neuron/223/
Neocortex basket cell	Explicitly referred to as basket cell, PV+ cell, or FS cell in any layer or subregion of neocortex	99	nifext_56	http://neuroelectro.org/neuron/99/
Neocortex bipolar neuron	Explicitly referred to as bipolar cell in any layer or subregion of neocortex	101	sao436474611	http://neuroelectro.org/neuron/101/
Neocortex chandelier cell	Explicitly referred to as chandelier cell in any layer or subregion of neocortex	104	nifext_57	http://neuroelectro.org/neuron/104/
Neocortex layer 4 stellate cell	Any excitatory cell in layer 4 of the neocortex; usually stellate cells in primary sensory areas	107	nifext_53	http://neuroelectro.org/neuron/107/
Neocortex Martinotti cell	Explicitly referred to as Martinotti cell or somatostatin positive or Low-threshold spiking cell in neocortex	98	nifext_55	http://neuroelectro.org/neuron/98/
Neocortex other cell	Any cell in neocortex that could not be classified to an existing neuron type	109	nifext_49	http://neuroelectro.org/neuron/109/
Neocortex pyramidal cell layer 2-3	Pyramidal cells of layer 2/3 of the neocortex; usually referred to as regular spiking cells	110	nifext_49	http://neuroelectro.org/neuron/110/
Neocortex pyramidal cell layer 5-6	Pyramidal cells of layer 5/6 of the neocortex; occassionally referred to as "deep" cells	111	nifext_50	http://neuroelectro.org/neuron/111/
Neostriatum cholinergic cell	Any cholinergic positive cell in the striatum	115	sao1866881837	http://neuroelectro.org/neuron/115/
Neostriatum gabaergic interneuron	Explicitly referred to as gabaergic cell, PV+ cell, or FS cell in striatum	209	nifext_143	http://neuroelectro.org/neuron/209/
Neostriatum medium spiny neuron	Explicitly referred to as MSNs in striatum	117	nifext_141	http://neuroelectro.org/neuron/117/
Neostriatum SOM/NOS cell	Somatostatin/NOS positive striatum cell	113	nifext_144	http://neuroelectro.org/neuron/113/
Neostriatum TH+ cell	Tyrosine hydroxylase positive cell in striatum	114		http://neuroelectro.org/neuron/114/
Nucleus accumbens core neuron	Explicitly found in the nucleus accumbens core (usually MSNs)	228	nlx_151892	http://neuroelectro.org/neuron/228/
Nucleus accumbens medium spiny neuron	Any MSN found in the nucleus accumbens	220		http://neuroelectro.org/neuron/220/
Nucleus accumbens shell neuron	Explicitly found in the nucleus accumbens shell (usually MSNs)	227	nlx_151893	http://neuroelectro.org/neuron/227/
Nucleus ambiguus motor neuron	Motor neuron found in the nucleus ambiguus	120	nlx_53276	http://neuroelectro.org/neuron/120/
Nucleus of the solitary tract principal cell	Projection neurons found in the nucleus of the solitary tract	122	nifext_100	http://neuroelectro.org/neuron/122/
Olfactory bulb (main) Blanes cell	Large neurons found in the olfactory bulb granule cell layer, usually referred to as Blanes cells or deep short-axon cells	127	nifext_124	http://neuroelectro.org/neuron/127/
Olfactory bulb (main) external tufted cell	Referred to as external tufted cells, any excitatory neurons with a cell body in the glomerular layer	132	nlx_82555	http://neuroelectro.org/neuron/132/
Olfactory bulb (main) granule cell	Granule cells found in the main olfactory bulb	128	nlx_407	http://neuroelectro.org/neuron/128/
Olfactory bulb (main) mitral cell	Cells in the mitral cell layer of the olfactory bulb	129	nlx_anat_100201	http://neuroelectro.org/neuron/129/
Olfactory bulb (main) periglomerular cell	Referred to as external tufted cells, any excitatory neurons with a cell body in the glomerular layer	130	nlx_cell_091202	http://neuroelectro.org/neuron/130/
Olfactory bulb (main) tufted cell (middle)	Referred to as middle tufted cells in main olfactory bulb	131	nifext_121	http://neuroelectro.org/neuron/131/
Olfactory cortex pyramidal cell	Explicitly referred to as pyramidal cells in the olfactory cortex	135	nifext_139	http://neuroelectro.org/neuron/135/
Olfactory cortex semilunar cell	Explicitly referred to as semilunar cells in the olfactory cortex	136	nlx_cell_091005	http://neuroelectro.org/neuron/136/
Paraventricular hypothalamic nucleus neurons	Any neuron in the paraventricular hypothalamic nucleus neurons	217		http://neuroelectro.org/neuron/217/
Parvicellular reticular nucleus interneuron	Any interneuron in the Parvicellular reticular nucleus	216		http://neuroelectro.org/neuron/216/
Spinal cord intermediate horn motor neuron sympathetic	Sympathetic motor neuron in spinal cord	165	nifext_109	http://neuroelectro.org/neuron/165/
Spinal cord ventral horn interneuron IA	IA interneuron in spinal cord	169	nifext_110	http://neuroelectro.org/neuron/169/
Spinal cord ventral horn interneuron II	II interneuron in spinal cord	171	nifext_112	http://neuroelectro.org/neuron/171/
Spinal cord ventral horn interneuron V2	V2 interneuron in spinal cord	175	nlx_cell_100207	http://neuroelectro.org/neuron/175/
Spinal cord ventral horn motor neuron alpha	Alpha motor neuron in spinal cord	177	sao1154704263	http://neuroelectro.org/neuron/177/
Subiculum pyramidal cell	Any pyramidal cell (all subtypes) in the subiculum	182	nlx_anat_1008012	http://neuroelectro.org/neuron/182/
Substantia nigra pars compacta dopaminergic cell	Substantia nigra pars compacta dopaminergic cell	183	nifext_145	http://neuroelectro.org/neuron/183/
Substantia nigra pars reticulata interneuron GABA	Substantia nigra pars reticulata cell, ocassional referred to as projection neurons	184	nifext_147	http://neuroelectro.org/neuron/184/
Subthalamic nucleus neuron	Any neuron in the subthalamic nucleus	233	nlx_149137	http://neuroelectro.org/neuron/233/
Superior colliculus superficial layer neuron	Any neuron in superficial layers of the superior colliculus	221	BAMSC1123	http://neuroelectro.org/neuron/221/
Suprachiasmatic nucleus neuron	Any neuron in the suprachiasmatic nucleus	213	nlx_151894	http://neuroelectro.org/neuron/213/
Supratrigeminal nucleus interneuron	Interneurons in the supratrigeminal nucleus	215		http://neuroelectro.org/neuron/215/
Thalamic reticular nucleus cell	Neurons in the thalamic reticuluar nucleus	190	nifext_45	http://neuroelectro.org/neuron/190/
Thalamus parafascicular nucleus neuron	Neurons in the thalamic parafascicular nucleus	212		http://neuroelectro.org/neuron/212/
Thalamus relay cell	Neurons in the thalamus, not in the reticular or parafascicular nucleus, usually LGN or MGN or cortical projection neurons	194	nlx_cell_20081203	http://neuroelectro.org/neuron/194/
Trigeminal nucleus motor neuron	Motor neurons in the trigeminal nucleus	199	nlx_44081	http://neuroelectro.org/neuron/199/
Trigeminal nucleus principal cell	Principal cells in the trigeminal nucleus, not referred to as motor neurons	200	nifext_96	http://neuroelectro.org/neuron/200/
Trochlear nucleus motoneurons	Motor neurons in the trochlear nucleus	225	nlx_70345	http://neuroelectro.org/neuron/225/
Ventral tegmental area dopamine neuron	Any dopaminergic neuron found in the VTA	203	nlx_cell_20090305	http://neuroelectro.org/neuron/203/
